# Supplementary material
Source: PubMed Central journal article supplement (PMC3165837)

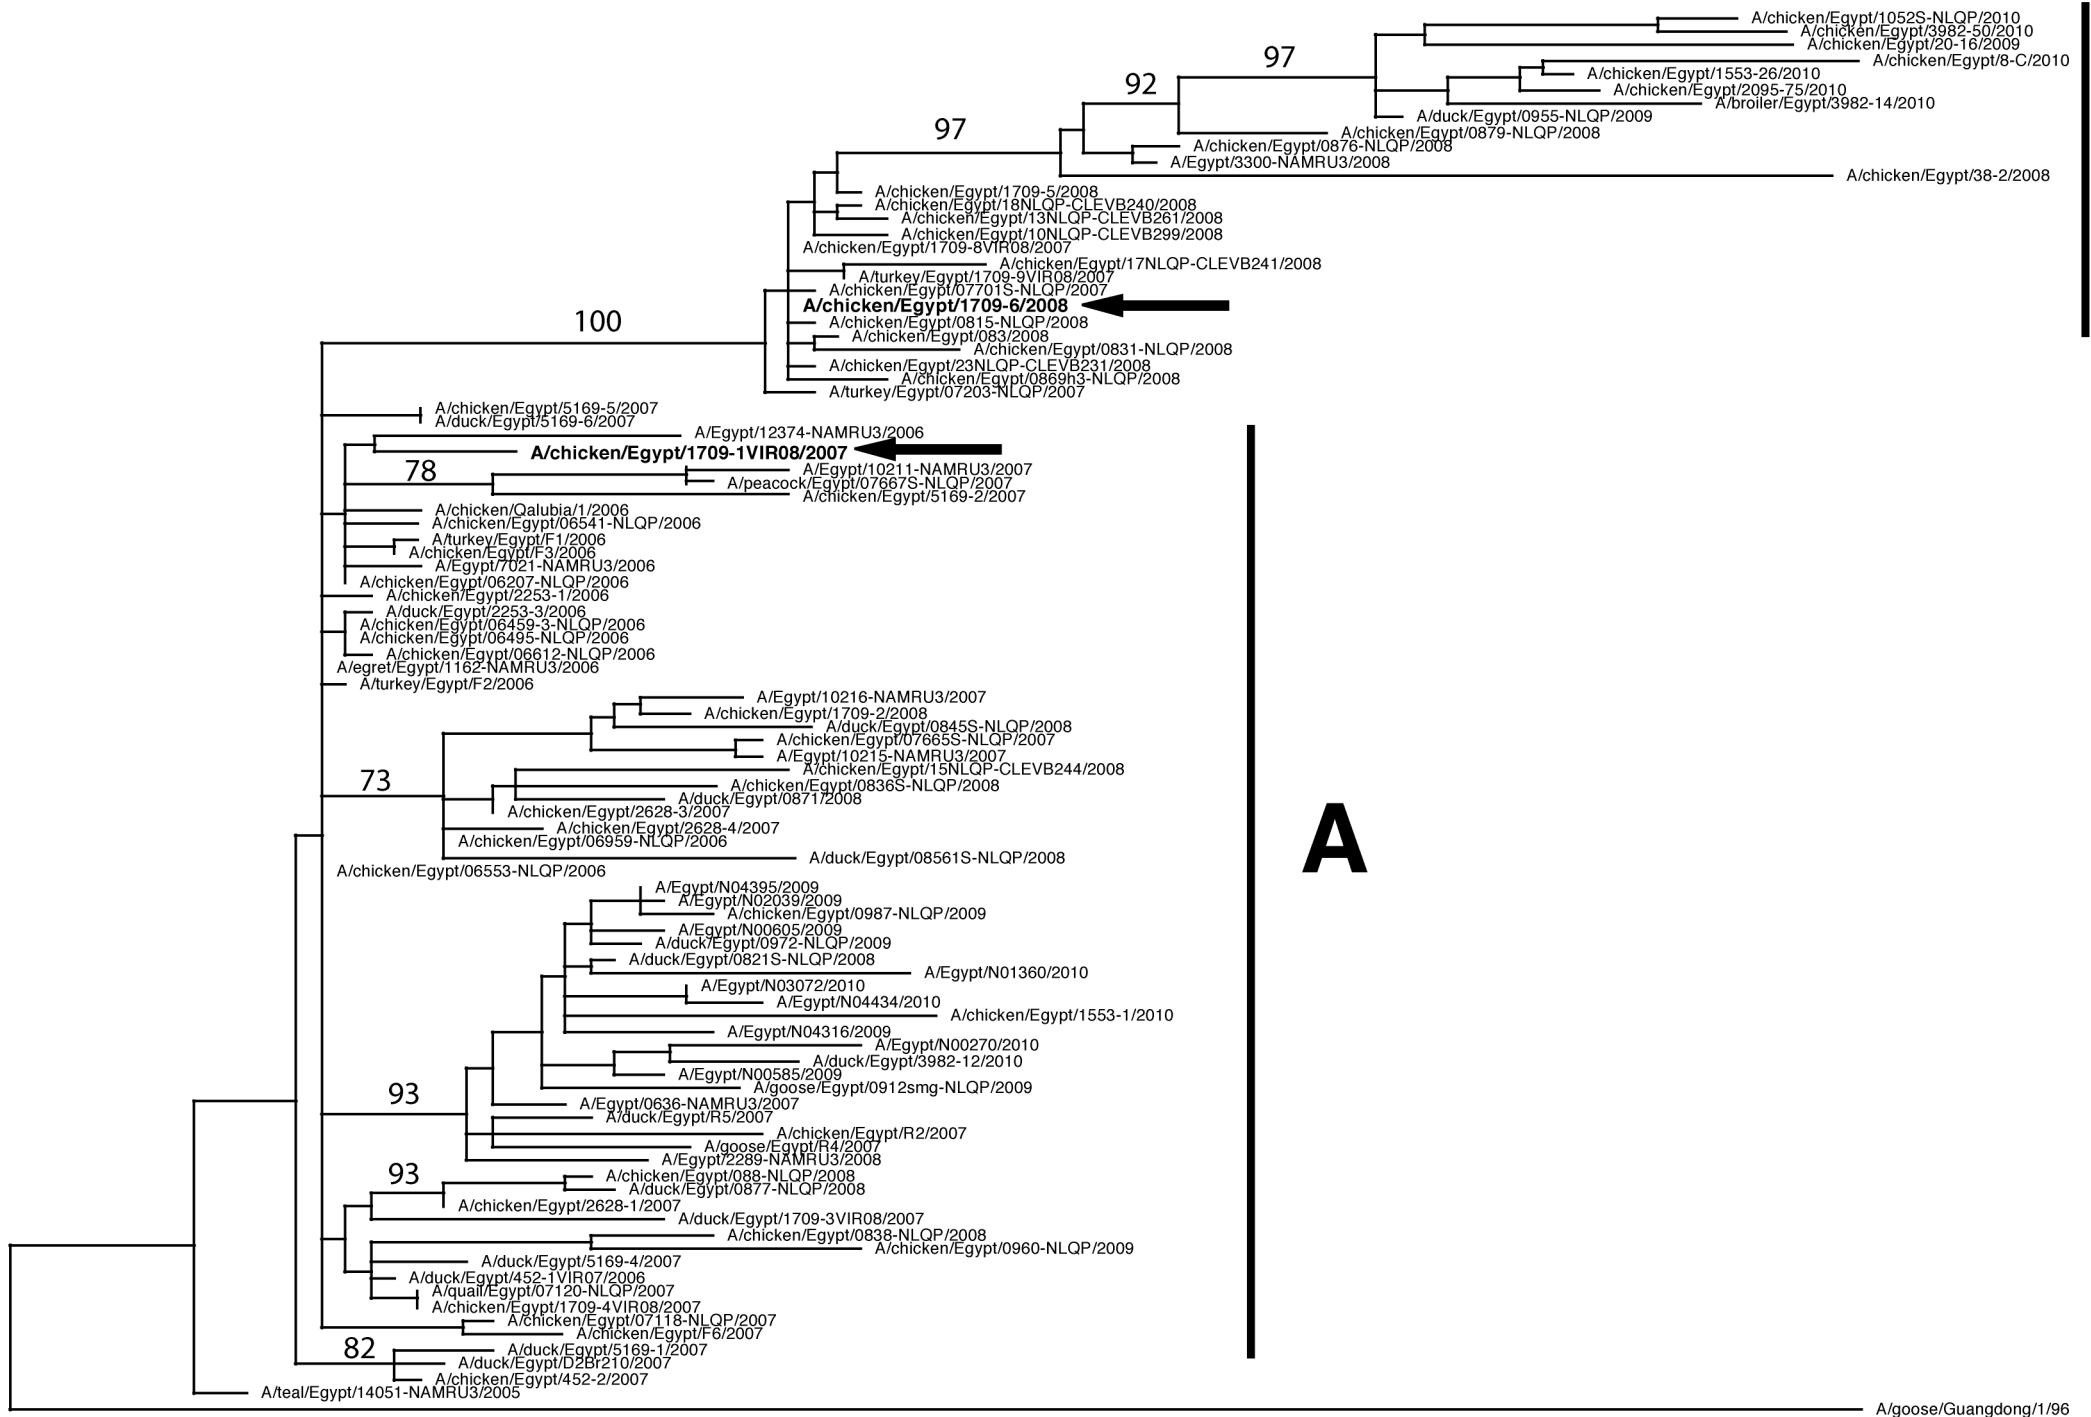

**B**

**A**

Supplement: supp_85_17_8718__1.pdf [file supp_85_17_8718__1.pdf]
